1 **Fungal communities associated with the eastern**  
2 **larch beetle: diversity and variation within**  
3 **developmental stages**

4

5

6 Audrey-Anne Durand, Jean-Philippe Buffet, Philippe Constant, Eric Déziel & Claude

7 Guertin\*

8

9 INRS-Institut Armand-Frappier, Laval (Québec), Canada

10

11 \*Corresponding Author: Claude Guertin, 531 Boul. Des Prairies, Laval, Quebec, Canada,

12 H7V 1B7, Phone: (450) 687-5010 ext. 4117, [Claude.Guertin@iaf.inrs.ca](mailto:Claude.Guertin@iaf.inrs.ca)

13

14 Keywords: Mycobiome, Fungal communities, *Dendroctonus*, Developmental stages,

15 Fungal diversity, High throughput sequencing.

16

## 17 **Abstract**

18

19           Bacterial and fungal communities associated with bark beetles, especially some  
20 *Dendroctonus* species, mediate challenging aspects of the subcortical habitat for their  
21 hosts. Filamentous fungi and yeasts are important in various metabolic processes of  
22 certain bark beetles, with involvement in nutrition, protection and detoxification of plant  
23 defense compounds. The eastern larch beetle, *Dendroctonus simplex*, is recognized as  
24 a serious forest pest in the upper part of North America. Although *D. simplex* is well  
25 studied, the fungal communities and their ecological role remain to be investigated. Here,  
26 using 18S rRNA gene pyrosequencing, we provide a comprehensive overview of the  
27 yeasts and filamentous fungi associated with the eastern larch beetle and compare  
28 fungal communities between different developmental stages and microenvironments.  
29 Fungal mycobiome associated with the galleries was also investigated. Our study has  
30 unveiled an unexpected fungal diversity associated with the developmental stages.  
31 Significant differences in species richness between the developmental stages were  
32 determined. Yeasts were found to be predominant in the adult and larval stages,  
33 whereas filamentous fungi were most prevalent in the pupae. Our results indicate a  
34 possible implication of yeasts in the eastern larch beetle nutrition.

## 35 Introduction

36 The bark beetle-microbe community is a complex assemblage that has  
37 fascinated ecologists and microbiologists for nearly a century. Indeed, bark beetles,  
38 especially *Dendroctonus* species (Coleoptera: Curculionidae: Scolytinae), are among the  
39 most ecologically important organisms in conifer forest ecosystems worldwide. They  
40 colonize the subcortical tissues of conifer with the aid of their microbiota, including  
41 filamentous fungi, yeasts and bacteria (Popa *et al.*, 2012; Six, 2013). These associated  
42 microorganisms play key roles in bark beetles' biology, including nutrition, protection  
43 against pathogens, detoxification of plant defense compounds for host plant use, and  
44 swarm behavior modifications by the synthesis of pheromones (Popa *et al.*, 2012;  
45 Adams *et al.*, 2013; Davis, 2014; Shi *et al.*, 2014; Hu *et al.*, 2015).

46 *Dendroctonus* species are commonly associated with filamentous fungi and  
47 yeasts (Rivera *et al.*, 2009; Popa *et al.*, 2012; Six, 2012; Davis, 2014; Hofstetter *et al.*,  
48 2015). The most prevalent bark beetle fungal partners are Ophiostomatales belonging to  
49 the *Grosmannia* and *Ophiostoma* genera, and yeasts of the *Saccharomycetaceae* family  
50 (Six *et al.*, 2011; Popa *et al.*, 2012; Davis, 2014). Bark beetles carry their fungal  
51 communities in the gut, on the surface of their exoskeleton or within highly specialized  
52 structures (Six, 2003; Six, 2012; Davis, 2014). As bark beetle tunnel under the bark, they  
53 inoculate the wall of their galleries with the fungus (Paine *et al.*, 1997; Six & Klepzig,  
54 2004).

55 While most bark beetle are phloeophagous, some are considered  
56 mycophloeophagous - gaining nutrients from feeding on fungi as well as phloem (Popa  
57 *et al.*, 2012; Six, 2013). Some of these nutritional symbioses are obligate where the  
58 beetle gains nitrogen and others nutrients from the fungi (Ayres *et al.*, 2000; Bleiker &  
59 Six, 2007). Feeding on Ophiostomatales fungi increases beetles fitness throughout their  
60 developmental stages by stimulating the growth of larvae as well as increasing the  
61 fecundity, reproduction and survival rate of adults (Moore & Six, 2015).

62 Yeasts, known to be prolific metabolizers, also have significant functional roles  
63 in bark beetle ecology. Some beetle-associated yeasts use terpene defenses as carbon  
64 sources (Davis, 2014). Furthermore, yeasts isolated from several *Dendroctonus* species  
65 produce a variety of volatile compounds acting as semiochemicals, which influence the  
66 behavior of beetles as well as their predators (Davis, 2014) and modulate the growth of  
67 filamentous fungi, including mutualists of the beetle, entomopathogens, and

68 opportunistic saprophytes (Hulcr & Dunn, 2011; Davis, 2014). Moreover, it has been  
69 suggested that yeasts provide nutritional supplements for the beetles; however, no direct  
70 evidence has yet supported this hypothesis (Six, 2013; Davis, 2014; Hofstetter *et al.*,  
71 2015).

72 The eastern larch beetle, *Dendroctonus simplex* LeConte, is a subcortical  
73 phloepagous insect that kills tamaracks, *Larix laricina* (Du Roi) K. Koch, and some  
74 exotic larch species. The distribution of this beetle extends throughout the range of the  
75 natural tree host, including northeastern and north-central of North America, western  
76 Canada, and Alaska (Langor & Raske, 1987a; Langor & Raske, 1987b; Seybold *et al.*,  
77 2002). This beetle is mainly considered as a secondary pest attacking freshly dead or  
78 weakened trees but, under epidemic conditions, it can also kill healthy *Larix* (Langor &  
79 Raske, 1987a; Langor & Raske, 1989). In the mid-1970s and early-1980s, a widespread  
80 outbreak of the eastern larch beetle caused the death of 1.4 million m<sup>3</sup> of tamarack in the  
81 Atlantic provinces of Canada alone. Since then, the eastern larch beetle has been  
82 recognized as a serious forest pest (Langor & Raske, 1989). During the dispersal period,  
83 pioneer beetles attack trees and build galleries in the phloem layer. Following the  
84 reproduction and eggs hatching, larvae also excavate galleries and eat phloem  
85 throughout their development. The last larval instar digs a pupal chamber, stops feeding  
86 and empties his digestive tract in preparation for transformation in pupae, representing  
87 an inactive stage. Pupae will then transform into adults, overwintering until the next  
88 dispersal period (Langor & Raske, 1987a; Langor & Raske, 1987b). Although *D. simplex*  
89 is well studied, the associated fungi and their ecological roles in the development of this  
90 beetle remain to be investigated.

91 Since the relative importance of the filamentous fungi and yeasts associated  
92 with bark beetles likely varies over their different growth stages, the present study was  
93 undertaken to identify an overall portrait of fungal communities associated with  
94 *D. simplex* throughout its ontogeny, using 18S rRNA amplicon pyrosequencing. We  
95 compared fungal communities between different developmental stages of the larch  
96 beetle (*i.e.*, adult, larva, and pupae). In a previous study, we have investigated the  
97 bacterial communities associated with the eastern larch beetle and found that the  
98 composition of bacterial communities is clearly dissimilar between the surface  
99 (ectomicrobiome) and the interior (endomicrobiome) of *D. simplex* body (Durand *et al.*,  
100 2015). Thus, these two microenvironments were also investigated in the present study.  
101 Additionally, the mycobiome associated with the galleries was also investigated. We

102 hypothesize that the abundance of the associated fungi should vary according to the  
103 developmental stage of the beetle. These results would provide insights into the  
104 potential ecological roles of filamentous fungi and yeasts in the insect life cycle.

105

106

## 107 **Materials and Methods**

### 108 **Site location, beetle processing, and samples**

#### 109 **preparation**

110 Beetles were collected from a provincial larch plantation located near Saint-  
111 Claude (Quebec, Canada; Lat. 45.6809, Long. -71.9969) with the permission of the  
112 Ministère des Forêts, de la Faune et des Parcs authority. Log sections of randomly  
113 selected larch trees showing apparent signs of attacks by *D. simplex* were transported to  
114 the laboratory where they were stored at room temperature in plexiglass cages (30 cm x  
115 30 cm x 88 cm). Beetle development was monitored weekly by gently peeling off the  
116 bark from the entry holes until the insects were reached. Based on their developmental  
117 morphology, pioneer beetles (adults), larvae, and pupae were randomly harvested with  
118 sterilized tweezers from different log sections, and insects were individually placed in  
119 sterile 2 ml microcentrifuge tubes.

120 For each developmental stage of *D. simplex*, the fungal microbiota associated  
121 with the ecto- and endomycobiome was recovered. For both of these fungal  
122 communities, three replicates were prepared following the method previously described  
123 (Durand *et al.*, 2015). For each replicate, 50 insects were randomly selected, for a total  
124 of 150 insects per developmental stage. Briefly, for the ectomycobiome of each  
125 developmental stage, insects were pooled in 15 ml polypropylene tubes to recover  
126 sufficient fungal genomic DNA from the surface of the cuticle. Then, each sample  
127 underwent five serial washes with 5 ml phosphate-buffered saline (PBS) containing  
128 0.1 % Triton X-100, with 1 min agitation (Genie 2 Vortex, Fisher, Ottawa, ON, Canada).  
129 The solution was filtered through a 0.22  $\mu$ m nitrocellulose filter (EMD Millipore, Billerica,  
130 MA, USA) to recover the biomass. Each filter was placed in a Lysing matrix A tube (MP  
131 Biomedicals, Solon, OH, USA) for DNA extraction. To recover the endomycobiome from  
132 each developmental stage, ten previously washed beetles were randomly selected for  
133 each replicate. Their external surface was sterilized with three serial washes in 70%

134 EtOH, followed by one wash with sterile water. The insects were then crushed into PBS  
135 and placed in a 2 ml screw cap tube containing 200 mg 0.1 mm glass beads (BioSpecs,  
136 Bartlesville, OK, USA) for DNA extraction.

137 The mycobiome associated with the subcortical galleries was recovered from the  
138 galleries where the pioneer beetles (adults) were collected. A total of 25 galleries were  
139 selected per replicate. First, insect frass was removed, and the inside galleries were  
140 carefully scraped using a sterile scalpel. For each selected gallery, the material was then  
141 placed in an individual sterile microtube. Samples were processed as for the  
142 ectomycobiome.

143

## 144 **DNA Extraction and PCR amplification**

145 Total DNA was extracted following the method previously described (Durand *et*  
146 *al.*, 2015). Briefly, 1 ml of extraction buffer containing 20 µg/ml RNase A was added to  
147 tubes containing the ecto- and endomycobiome. Cell lysis was achieved using the  
148 FastPrep®-24 Instrument (MP Biomedicals, Solon, OH, USA). Two cycles of lysis at 4  
149 m/s for 50 s followed by 5 min on ice were performed consecutively. After centrifugation  
150 at 16,800 x *g* for 5 min, the supernatant was recovered, and extraction buffer containing  
151 RNase A was added to the previous tubes for the second cycle of lysis. Ammonium  
152 acetate was added to the supernatant at a final concentration of 2 M. The content was  
153 briefly mixed by inversion and the tubes kept on ice for 5 min before centrifugation at  
154 20,800 x *g* for 15 min at 4°C. After collecting the supernatant, a second centrifugation  
155 was done with the same parameters. An equal volume of isopropyl alcohol (2-Propanol)  
156 was added to the supernatant, and DNA precipitation was performed overnight at 4°C.  
157 Centrifugation at 20,800 x *g* at 4°C for 30 min was done the next morning; then  
158 supernatant was discarded. Pellets were washed twice with 70% EtOH and were  
159 centrifuged at 20,800 x *g* for 15 min at 4°C. The EtOH supernatant was discarded, and  
160 pellets were air-dried before suspension in sterile ultrapure water. DNA concentration  
161 was estimated using the Quant-iT™ PicoGreen® dsDNA Assay Kit (Invitrogen, Life  
162 Technologies, Burlington, ON, Canada) following the manufacturer instruction. The  
163 integrity of the genomic DNA was confirmed on a 1% agarose gel stained with ethidium  
164 bromide and visualized under UV light.

165 PCR amplification was achieved to confirm the presence of fungal DNA in the  
166 samples. Universal fungal primer NSA3 (5' AAA CTC TGT CGT GCT GGG GAT A 3')

167 and NLC2 (5' GAG CTG CAT TCC CAA ACA ACT C 3') were used to amplified the SSU,  
168 ITS and LSU regions of the rRNA gene (Martin & Rygiewicz, 2005). Each 50 ul PCR  
169 reaction contained 25 mM MgCl<sub>2</sub>, 10 µg BSA, 10 mM dNTPs, 10 mM of each primer, 5 U  
170 Taq DNA polymerase and 10x ThermoPol® buffer (New England Biolabs, Whitby, ON,  
171 Canada). Following the initial denaturation step of 5 min at 94°C, 30 amplification cycles  
172 were performed (94°C for 30 s, 67°C for 30 s, 72°C for 1 min) followed by a final  
173 extension step at 72°C for 10 min. Amplification was confirmed by electrophoresis of the  
174 PCR products on a 1.5% agarose gel stained with ethidium bromide and visualized  
175 under UV light. A negative control using all the extraction solutions but no insect was  
176 performed, and no amplification was observed.

177

## 178 **Fungal 18S rRNA pyrosequencing**

179 DNA samples were sent to Research and Testing Laboratory (Lubbock, TX,  
180 USA) for sequencing. The fungal 18S rRNA gene was amplified using the universal  
181 primers SSUForward (5' TGG AGG GCA AGT CTG GTG 3') and funTitSsuRev (5' TCG  
182 GCA TAG TTT ATG GTT AAG 3'). Roche 454 FLX-Titanium chemistry was used to  
183 sequence the amplicons. Elongation was performed from the forward primer. Raw data  
184 are available on NCBI under BioProject number PRJNA354793 for the developmental  
185 stages of *D. simplex* and PRJNA377102 for the galleries.

186

## 187 **Sequences processing pipeline**

188 The post-sequencing processing were completed using the open-source program  
189 mothur v.1.33.0 software (<http://www.mothur.org>) (Schloss *et al.*, 2009). Raw 454 reads  
190 were first processed to remove low quality reads, such as those containing (i) one or  
191 more uncertain bases (N), (ii) sequences shorter than 150 nt (nucleotides), (iii) unusually  
192 long reads that extended more than 100 nt over the amplicon size, (iv) reads that have  
193 long homopolymer sequences (more than 8), and (v) reads with incorrect forward primer  
194 sequences. Regions corresponding to the forward primer were kept to facilitate the  
195 alignment of the sequences during subsequent analyzes. Chimeras were removed with  
196 UCHIME against the SILVA reference alignment release 119 (Edgar *et al.*, 2011; Quast  
197 *et al.*, 2013), as implemented in mothur. The remaining filtered sequences were aligned  
198 by domain against the SILVA reference alignment using the ksize=9 parameter in  
199 mothur. Reads were also trimmed of all bases beyond the reverse primer with BioEdit

200 7.2.5 (<http://www.mbio.ncsu.edu/bioedit/bioedit.html>). Singletons were finally removed  
201 after clustering into draft Operational Taxonomic Units (OTUs) to obtain the final high  
202 quality reads. Libraries were normalized to the sequencing effort of the smallest 18S  
203 rRNA gene library (2641 sequences) to avoid biases in comparative analyzes introduced  
204 by the sampling depth. The final aligned reads were clustered into OTUs at  $\geq 97\%$   
205 identity using the furthest neighboring cluster in mothur (Schmitt *et al.*, 2012).  
206 Representative sequences of each OTU were taxonomically identified by BLASTN  
207 against the NCBI database (<http://www.ncbi.nlm.nih.gov>). The taxonomic identification is  
208 based on the current name in MycoBank Database (<http://www.mycobank.org>). Some  
209 contaminant OTUs related to protists were identified in a few samples; they were  
210 removed from the data set. The relative abundance of each OTU is presented.

211

## 212 **Diversity analysis**

213 Rarefaction curves were generated using the mothur software. Diversity analyzes  
214 were performed with the R software 3.1.3 (<http://www.r-project.org>). Shannon index was  
215 calculated with the package “vegan”. ANOVA was performed with JMP Pro 12 (SAS  
216 Institute Inc., Cary, NC, USA) on obtained values. A Hellinger transformation was first  
217 applied to standardize the dataset. The “vegan” and “gclus” packages were used to  
218 generate the PCA. Equilibrium circle (not shown) of descriptor with the radius  $\sqrt{d/p}$   
219 (where  $d$  is the number of dimensions of the reduced space: 2 and  $p$  is the total space:  
220 1634) was plotted to identify OTUs significantly contributing to the axes defining the  
221 position of sampling sites. Additionally, a PERMANOVA was calculated with the package  
222 “vegan”. Indicator OTUs characterizing the different developmental stages were  
223 generated using the package “indicspecies”. Heatmap representing the distribution of  
224 these indicators across the developmental stages was generated using the “gplots” and  
225 “RColorBrewer” packages.

226 The representative sequences of each of the 69 OTUs found in high relative  
227 abundance throughout beetle developmental stages ( $\geq 1\%$  of sample abundance), as  
228 well as their closely related sequences identified by BLASTN against NCBI database,  
229 were aligned together with the MUSCLE (Edgar, 2004) algorithm implemented in MEGA.  
230 A maximum likelihood phylogenetic tree was built with FastTree 2.1.7 (Price *et al.*, 2010)  
231 using the GTR model with 1000 resampling to estimate node support values.

232



## 233 **Isolation and culture of *D. simplex* associated fungi**

234 Yeasts and filamentous fungi associated with the adults of *D. simplex* were  
235 isolated using the same method previously described. The wash solutions and the  
236 crushed insects were plated on several culture media: Potato Dextrose Agar (pH 7.4; BD  
237 Difco, Franklin lakes, NJ, USA), Malt Extract Agar (pH 4.7; BD Difco), Czapek Solution  
238 Agar (pH 7.3; BD Difco) and Yeast Malt Extract Agar (pH 3.5; 0.3% yeast extract, 0.3%  
239 malt extract, 1% glucose, 0.5% tryptone, 2% agar). To only obtain fungi isolates, 1  
240 mg/ml streptomycin, 0.05 mg/ml penicillin and 0.05 mg/ml chloramphenicol were added  
241 to the media. Petri dishes were incubated for two weeks at 25°C. Obtained fungi were  
242 purified separately on the same medium following the same conditions.

243 DNA extraction of the purified fungi was achieved using the same protocol as  
244 described above. A PCR amplification was done with the universal primers ITS1 (5' TCC  
245 GTA GGT GAA CCT GCG G 3') and ITS4 (5' TCC TCC GCT TAT TGA TAT GC 3')  
246 (White *et al.*, 1990). After visualisation, PCR products were purified using the EZ-10 spin  
247 column PCR purification kit (Bio Basic, Markham, ON, Canada). A digestion with the  
248 restriction enzymes HaeIII, DdeI and HinfI (NEB) was done to select unique isolates.  
249 Selected purified PCR products were sequenced using the same primers and  
250 taxonomically identified by BLASTN. Isolates corresponding to OTUs identified by high-  
251 throughput sequencing are presented in supplemental data (Table S2).

252

253

## 254 **Results**

### 255 ***Dendroctonus simplex* fungal diversity across** 256 **developmental stages and microenvironments**

257 To compare the fungal microbiota associated with the developmental stages and  
258 microenvironment of *D. simplex*, the ecto- and endomycobiome of the adults, larvae and  
259 pupae were recovered, using 50 insects for each of the three replicates per  
260 developmental stages. Following DNA extraction, a total of 18 samples were analysed,  
261 and 117,949 raw sequences were obtained. After quality control, 85,216 high-quality-  
262 filtered sequences were left. The average read length was 447 bp. After the equalization  
263 step and removing the protist reads, 44,377 sequences were kept for the remaining  
264 analyses. Clustering at 97% pairwise-identity threshold generated 1623 OTUs.

265 Rarefaction curves tend toward an asymptote, indicating that a suitable number of  
266 sequences were obtained for this analysis, although not all diversity was recovered (Fig  
267 S1). This indicates that a larger number of sequences will be needed in future studies.  
268 Additionally, no significant differences were observed in the diversity (Shannon index)  
269 between the analysed samples (Table S1).

270 A principal component analysis (PCA) was generated to see the dispersion of the  
271 samples along the axes of variation (Fig 1). Together, the first two axes explained 52.8%  
272 of the variation. The three replicates from all sample types clustered together, except  
273 one replicate associated with the endomycobiome of the adults, showing the evenness  
274 of the results. However, the dissimilarity of this particular sample did not influence the  
275 positions of the other samples in the PCA (data not shown). All replicates from the  
276 ectomycobiome of the adults and larvae are grouped together, showing similarity in the  
277 composition of their fungal communities. Samples belonging to the endomycobiome of  
278 larvae showed significant divergence from other samples, as they are separated by the  
279 second axis (19.3%). Finally, the pupae samples (ecto- and endo-) are separated from  
280 the two other developmental stages by the first axis (33.5%), showing a divergent OTUs  
281 assembly associated with this developmental stage.

282 Four OTUs had a significant effect on the position of the samples in the PCA,  
283 represented by two yeasts and two filamentous fungi. *Candida arabinofementans*  
284 influenced the position of the adults and larvae ectomycobiome, whereas one OTUs  
285 belonging to the *Yamadazyma* genus influenced the position of the adult's  
286 endomycobiome. Two filamentous fungi genera, *Ceratocystiopsis* and *Ophiostoma*,  
287 influenced the position of pupae samples. Theses results seem to indicate that yeasts  
288 have an impact on the position of adults and larvae samples, whereas filamentous fungi  
289 influence the pupae samples position.

290 The PCA analysis seems to indicate that the developmental stages apply a  
291 selective pressure on the mycobiome, as shown by the position of the samples along the  
292 axes of variation. Accordingly, the developmental stage explained 59.1% of the variation  
293 observed in our analyses (PERMANOVA, p-value = 0.001).

294

## 295 **Taxonomic identification of mycobiome associated with** 296 **developmental stages**

297 Each of the 1623 OTUs linked to the developmental stages of the beetle was  
298 taxonomically identified by BLASTN against the NCBI database. A phylogenetic tree was  
299 generated with the abundant ( $\geq 1\%$ ) OTUs to confirm their taxonomic affiliations (Fig S2).  
300 Figure 2 shows the taxonomic identification of abundant ( $\geq 1\%$  of sample relative  
301 abundance) yeast and filamentous fungi for each of the six microenvironments  
302 investigated. All identified yeasts and filamentous fungi belonged to the phylum  
303 Ascomycota. More specifically, all yeasts belong to the Saccharomycetes class,  
304 whereas filamentous fungi belonged to diverse classes. Yeasts were predominant in the  
305 adult ecto- and endomycobiomes, with more than 70% of the total abundance in each  
306 sample. Additionally, yeasts were also predominant in the larval ecto- and  
307 endomycobiome with, respectively, about 75% and 65% of the total abundance. On the  
308 other hand, filamentous fungi were most prevalent in the pupae, with 54% and 35%  
309 related, respectively, to ecto- and endomycobiomes. Depending on the samples,  
310 between 20 to 29% of the sequences observed were associated with non-abundant  
311 OTUs ( $<1\%$  of the sample abundance). Among abundant OTUs, only one (1% to 20%  
312 according of the samples) was found in all microenvironments and was identified as  
313 *Candida oregonensis*. Additionally, one OTU assigned to the *Yamadazyma* genus (2%  
314 to 14%) was identified in all samples belonging to the ectomycobiome.

315 Among the identified yeasts, *Candida* species such as *C. arabinofementans*, *C.*  
316 *tenuis* and *Candida* sp. were the most abundant, ranging from 5% to 30% of all OTUs.  
317 These OTUs were closely related to the ecto- and endomycobiome of adults and larvae,  
318 and under represented in pupae samples. On the other hand, OTUs corresponding to  
319 genera such as *Kuraishia*, *Ogataea* and *Peterozyma*, ranging from 1% to 7%, were also  
320 associated with both the ecto- and endomycobiome of adults and larvae, but not with the  
321 pupal samples. Additionally, *Saccharomycopsis* and *Wickerhamomyces* represented 1%  
322 to 13% of total abundance in adult and larval samples but were underrepresented in  
323 pupae samples. Finally, *C. oregonensis* and OTUs related to the *Yamadazyma* genus  
324 were found in all samples and were the two major yeast in pupal samples.

325 Among the identified filamentous fungi, *Ophiostoma* exhibited the highest  
326 abundance, with up to 40% in the pupae ectomycobiome. Moreover, these OTUs were  
327 found mainly in the pupal samples but were also identified in the adult's ecto- and  
328 endomycobiome, with abundance around 2%. *Ceratocystiopsis* genus was prevalent in  
329 pupal samples, with up to 14% of sample abundance. Additionally, this genus was also  
330 identified in the endomycobiome of the adults (3%). *Penicillium* was also found (3%) in

331 the larvae endomycobiome, but was mostly absent in the other samples. Two others  
332 filamentous fungi genera were identified, such as *Ceratostomella* and *Exophiala*, with  
333 abundance close to 1%.

334 Indicator OTUs were calculated to define fungal OTUs that were closely  
335 associated with each developmental stage and microflora of *D. simplex* (Fig 3). Indicator  
336 OTUs associated with adult and larvae were all yeasts, whereas almost all OTUs  
337 associated with the pupae were filamentous fungi, reflecting the taxonomic identification  
338 (Fig 2). Several indicator OTUs were shared between the adults and larvae  
339 ectomycobiome, related to *C. arabinofementans* and the genera *Peterozyma* and  
340 *Wickerhahomyces*, with higher abundance in larvae samples. Only one OTU, belonging  
341 to the *Ogataea* genus, was specific to the adult's ectomycobiome. These results  
342 highlight, once again, the similarities between the ectomycobiome of adults and larvae.  
343 In contrast, indicator OTUs were specific for each developmental stage in the case of the  
344 endomycobiome of adults and larvae, with only one OTU abundantly present for the  
345 adults, identified as *C. oregonensis*. A greater number of indicator OTUs were identified  
346 for the larvae, mostly belonging to the genus *Candida*, and one OTU belonging to the  
347 genus *Ogataea*.

348 Mostly filamentous fungi and one yeast were identified as indicator OTUs for both  
349 the ecto- and endomycobiome of the pupae. The ectomycobiome of the pupae is the  
350 niche where the larger number of specific indicator OTUs was found. Among them,  
351 *Ceratostomella*, *Ophiostoma* and *Yamadazyma* genera were identified. Other indicators,  
352 belonging to the genera *Slopeiomyces*, *Bussabanomyces*, *Xenopyricularia* and  
353 *Raffaelea* were also identified in lower abundance. Only two indicators OTUs were  
354 identified for the endomycobiome of pupae, belonging to the *Chalara* and  
355 *Ceratocystiopsis* genera. These results highlight, once again, the strong association of  
356 filamentous fungi with the pupal stage.

357

## 358 **Taxonomic identification of mycobiome associated with** 359 **the environment of *D. simplex***

360 In order to identify the fungi diversity associated with the immediate environment  
361 of the beetle, the 438 OTUs associated with the galleries were taxonomically identified  
362 by BLASTN against NCBI database. Table 1 shows the identification of the abundant  
363 fungi for each replicate. All abundant OTUs were identified as yeast, such as *Candida*

364 species that represent together 43% of the relative abundance. The *Wickerhamomyces*  
365 genus was also highly represented in the galleries (17%). Other genera of yeasts were  
366 identified with abundance ranging from 2% to 6%, such as *Yamadazyma*, *Ogatea*,  
367 *Kuraishia*, *Peterozyma* and *Saccharomycopsis*. All identified abundant OTUs associated  
368 with the galleries were also associated with the eastern larch beetle developmental  
369 stages (Fig 2). Additionally, some non-abundant OTUs were found, representing 19% of  
370 samples relative abundance.

371

372

## 373 Discussion

374 The aim of this work was to characterize the mycobiome (filamentous fungi and  
375 yeasts) associated with the different developmental stages of the eastern larch beetle.  
376 Associations between several *Dendroctonus* species and their fungal partners have  
377 been widely reviewed (Popa *et al.*, 2012; Six, 2013). However, the mycobiome of the  
378 eastern larch beetle has never been comprehensively studied. Here, we investigated the  
379 fungal diversity associated with the ecto- and endomycobiomes of adult, larvae, and  
380 pupae developmental stages of *D. simplex* and their immediate environment using 18S  
381 rRNA pyrosequencing. Our results showed that yeasts were mainly associated with the  
382 adults and larvae, whereas filamentous fungi were prevalent in the pupal stage.

383 Great fungi diversity was identified for each developmental stage and microflora.  
384 The fact that fungi are present throughout the ontogeny of the beetle suggests that they  
385 are probably essential for the insect's development. No statistically significant  
386 differences were observed between the ecto- and endomycobiome of all developmental  
387 stages in term of diversity, which indicates that fungal flora is equally distributed at the  
388 surface of the cuticle and in the interior of the insect. A variety of filamentous fungi and  
389 yeasts can accomplish a single essential function within the beetle microbiome  
390 (Hofstetter *et al.*, 2015). The eastern larch beetle could then benefit from transporting a  
391 wide variety of associated fungi, promoting the adaptation to a broader range of  
392 environments. Although Davis (2014) mentioned that bark beetles harbour a lower yeast  
393 diversity compared to other families of beetles, we found a significant yeast diversity  
394 throughout the developmental stages of *D. simplex*. In fact, yeasts were more abundant  
395 than filamentous fungi (50 OTUs and 19 OTUs found in abundance respectively).  
396 Filamentous fungi associated with bark beetles have been reported to interfere with the

397 tree defense systems, as well as other possible function, impeding tree defenses (Paine  
398 *et al.*, 1997; Six & Wingfield, 2011). As the eastern larch beetle attacks mostly weakened  
399 or freshly dead trees, the presence of filamentous fungi may be less critical, allowing a  
400 greater proportion for insect-associated yeasts. The higher diversity observed in this  
401 study compared to previous ones may also be due to a bias associated with the  
402 technique used. Most previous studies on bark beetles employed culture-dependant or  
403 molecular methods (Adams & Six, 2007; Khadempour *et al.*, 2012; Lou *et al.*, 2014; Hu  
404 *et al.*, 2015), whereas here we used high throughput sequencing, which allowed the  
405 identification of the majority of the specific richness, explaining the higher number of  
406 observed species.

407 Fungal diversity associated with the ectomycobiome of adults and larvae is  
408 similar to each other, but distinct from that of the pupal stage, as shown by the PCA and  
409 the higher relative abundance of yeasts in the adults and larvae stages. This shift in  
410 fungal communities can be explained by the fact that pupae are an inactive stage found  
411 in a closed environment, and that they do not feed. Oppositely, adults and larvae share  
412 the same environment under the bark. During the construction of galleries, mainly yeasts,  
413 and filamentous fungi, carried by the adults could be inoculated into the galleries.  
414 Accordingly, 10 species of yeasts identified in the ectomycobiome of adults and larvae  
415 were also identified in the beetle's galleries, which represent 80% of galleries abundance.  
416 Oppositely, only one species of filamentous fungi found in the ectomycobiome of the  
417 adults was identified in the galleries. Yeasts are frequently isolated from adults and  
418 larvae of bark beetles (Davis, 2014; Hofstetter *et al.*, 2015). Almost all the identified  
419 yeasts in this study were also previously recovered from various beetles (Davis, 2014).  
420 The endomycobiome of the adults and larvae, even if they represent two distinct  
421 populations as shown on the PCA, are also composed of a great majority of yeast OTUs.  
422 Only a few filamentous fungi were found in these microenvironments. During the beetle  
423 development, adults and larvae feed on bark as they construct their galleries (Langor &  
424 Raske, 1987b; Wood, 2007). Simultaneously, they feed on yeasts and filamentous fungi  
425 found in their galleries, which significantly reduced their development period (Paine *et al.*,  
426 1997; Six & Paine, 1998; Klepzig & Six, 2004; Davis, 2014). However, even if the  
427 nutritional benefits of yeasts have often been proposed for bark beetles, no study clearly  
428 demonstrates this phenomenon (Davis, 2014). The high prevalence of yeasts associated  
429 with the adults and larvae and the presence of small proportions of filamentous fungi  
430 associated with their endomycobiomes are supporting the hypothesis that yeasts are

431 essential nutritional elements for the development of the eastern larch beetle and that  
432 the insect is performing some microbial gardening. Some insects, such as ants, termites  
433 and ambrosia beetles, transport and cultivate their fungal associates in order to feed on  
434 them (Mueller & Gerardo, 2002; Mueller *et al.*, 2005). Furthermore, fungus gardens of  
435 scolytine ambrosia beetles are composed of an assemblage of filamentous fungi, yeasts  
436 and bacteria (Mueller *et al.*, 2005). This fungus-farming behaviour has never been  
437 observed in bark beetles to date. This type of behaviour, *i.e.* inoculating their fungal  
438 associates in galleries in order to feed on them, could explain the similarities observed  
439 between the adults and larvae mycobiome. Yeasts and filamentous fungi associated with  
440 *Dendroctonus* species provide the insect with essential nutrients, such as sterols,  
441 reducing the developmental time of larvae and increasing beetle fitness (Six & Paine,  
442 1998; Bentz & Six, 2006). Moreover, yeasts such as *Candida* species can assimilate  
443 nutrient such as nitrate, xylose and cellobiose (Lou *et al.*, 2014). Nutritional need should  
444 be different over the developmental stages of the beetle, as the beetle needs nutritional  
445 benefits to accomplish different steps in its life cycle, such as ovogenesis and  
446 development. These differences in requirements could reflect the greater distance  
447 observed associated with the endomycobiome, whereas different yeasts could provide  
448 the insect with different nutrients, supporting once again the nutritional hypothesis for  
449 yeasts.

450 In the literature, many functions have been associated with yeasts other than  
451 nutrition, such as mediation of beetle-microorganism interactions, production of volatiles  
452 compounds or degradation of tree chemicals (Davis, 2014). These functions can be  
453 accomplished by many genera of yeasts, while a single yeast may accomplish many  
454 functions (Six, 2013; Davis, 2014). Pioneer beetles were collected for this study. During  
455 the beetle attack, the trees release volatile compounds, such as terpenes, that are toxic  
456 to the insects (Adams *et al.*, 2011; Davis & Hofstetter, 2012). Some yeast associated  
457 with the eastern larch beetle may detoxify the environment, facilitating the adaptation of  
458 the insect. It has been shown that *O. pini*, associated to female *D. brevicomis*, can alter  
459 concentration of monoterpenes present in phloem tissue of *Pinus ponderosa* over time  
460 (Davis & Hofstetter, 2011). Accordingly, *Ogataea* was found in abundance in the adults  
461 and larvae ectomycobiome.

462 A few filamentous fungi were identified in samples coming from the ecto- and  
463 endomycobiome of the adults and larvae, such as *Ophiostoma* and *Ceratocystiopsis*.  
464 These genera are grouped as ophiostomatoids fungi, which are commonly associated

465 with bark beetles (Paine *et al.*, 1997; Six & Wingfield, 2011; Six, 2013; Hofstetter *et al.*,  
466 2015). These fungi help beetles to overcome tree defenses by colonizing resin ducts, in  
467 order to proceed to a successful attack (Paine *et al.*, 1997). This function may explain  
468 the presence of a few ophiostomatoids fungi associated mainly with the adult's samples,  
469 responsible for the initial attack and detoxification of the immediate environment. Among  
470 other roles, nutrition and mediation of microbial associations have been proposed (Paine  
471 *et al.*, 1997).

472 The mycobiomes associated with the surface and the interior of the pupae are  
473 separated from the other developmental stages of the beetle, as shown on the PCA.  
474 Under the bark, pupae are found in a pupal chamber closed by frass, forming a  
475 restricted environment (Langor & Raske, 1987a). This microenvironment likely explains  
476 why pupae have such a different mycobiome from the other two developmental stages,  
477 especially represented by a majority of filamentous fungi. Indeed, indicator OTUs for this  
478 developmental stage are almost all filamentous fungi, showing a strong association  
479 between them. For instance, *Ophiostoma* was more abundant in these samples (41% in  
480 the ectomycobiome and 19% in the endomycobiome) than in the adult's samples (3%  
481 and 2% respectively). Other ophiostomatoids fungi were also identified in those  
482 samples. During the pupal stages, beetles stop feeding and undergo a reorganization of  
483 their body (Langor & Raske, 1987a). This finding could explain why yeast abundance  
484 was less important in these samples, once again supporting the hypothesis of a  
485 nutritional function for these associates. Pupae are also more fragile than the other  
486 developmental stages of the beetle. Filamentous fungi associated with the bark beetles  
487 can protect the insect against antagonistic fungi by inhibiting their growth (Paine *et al.*,  
488 1997). Pupae may need these filamentous fungi for protection during this crucial period  
489 of development.

490 Important fungal diversity was identified associated with developmental stages of  
491 the eastern larch beetle. Yeasts were more abundant than filamentous fungi in the  
492 samples coming from the adults and larvae, presumably indicating a nutritional benefit  
493 from this type of microorganism. In contrast, fungi were more abundant at the pupae  
494 stages, possibly reflecting a role in protection. Further studies are required to confirm  
495 these functions. Our results reveal that the eastern larch beetle is closely associated  
496 with various yeasts and filamentous fungi throughout its development cycle, with varying  
497 relative abundances according to the developmental stages. We propose that microbial  
498 gardening behaviour is probably involved as yeasts and filamentous fungi seem to play



499 essential roles in the development of the eastern larch beetle. Bacteria and fungi are  
500 important partners in the *D. simplex* microbiome. Now that the bacterial and fungal  
501 microbiomes of this beetle have been characterized, it will be interesting to study the  
502 ecological interactions between these two types of microorganisms, in order to better  
503 understand the mechanism of *D. simplex* attack and development under the bark.  
504

## 505 **Funding**

506 This work was supported by the Direction Générale de la Production des  
507 Semences et de Plants Forestiers (DGPSP) [grant number DGPSP-2013-1122435] to  
508 CG. AAD was supported by a Wladimir A. Smirnoff Fellowship.

509

510

## 511 **Acknowledgments**

512 We would like to thank Amélie Bergeron for her help with samples preparation  
513 and DNA extraction. We would also like to thank Fabrice Jean-Pierre and Marie-  
514 Christine Groleau for technical assistance.

515

516

## 517 **References**

518

- 519 Adams AS, Aylward FO, Adams SM, Erbilgin N, Aukema BH, Currie CR, Suen G & Raffa KF  
520 (2013) Mountain pine beetles colonizing historical and naïve host trees are  
521 associated with a bacterial community highly enriched in genes contributing to  
522 terpene metabolism. *Appl. Environ. Microbiol.* 79: 3468-3475.
- 523 Adams AS, Boone CK, Bohlmann J & Raffa KF (2011) Responses of bark beetle-associated  
524 bacteria to host monoterpenes and their relationship to insect life histories. *J.*  
525 *Chem. Ecol.* 37: 808-817.
- 526 Adams AS & Six DL (2007) Temporal variation in mycophagy and prevalence of fungi  
527 associated with developmental stages of *Dendroctonus ponderosae* (Coleoptera:  
528 Curculionidae). *Environ. Entomol.* 36: 64-72.
- 529 Ayres MP, Wilkens RT, Ruel JJ, Lombardero MJ & Vallery E (2000) Nitrogen budgets of  
530 phloem-feeding bark beetles with and without symbiotic fungi. *Ecology* 81: 2198-  
531 2210.

- 532 Bentz BJ & Six DL (2006) Ergosterol content of fungi associated with *Dendroctonus*  
533 *ponderosae* and *Dendroctonus rufipennis* (Coleoptera: Curculionidae, Scolytinae).  
534 *Ann. Entomol. Soc. Am.* 99: 189-194.
- 535 Bleiker KP & Six DL (2007) Dietary benefits of fungal associates to an eruptive herbivore:  
536 Potential implications of multiple associates on host population dynamics.  
537 *Environ. Entomol.* 36: 1384-1396.
- 538 Davis TS (2014) The Ecology of Yeasts in the Bark Beetle Holobiont: A Century of  
539 Research Revisited. *Microb. Ecol.* 69: 723-732.
- 540 Davis TS & Hofstetter RW (2011) Reciprocal interactions between the bark beetle-  
541 associated yeast *Ogataea pini* and host plant phytochemistry. *Mycologia* 103:  
542 1201-1207.
- 543 Davis TS & Hofstetter RW (2012) Plant secondary chemistry mediates the performance  
544 of a nutritional symbiont associated with a tree-killing herbivore. *Ecology* 93:  
545 421-429.
- 546 Durand A-A, Bergeron A, Constant P, Buffet J-P, Déziel E & Guertin C (2015) Surveying  
547 the endomicrobiome and ectomicrobiome of bark beetles: The case of  
548 *Dendroctonus simplex*. *Sci Rep* 5: 17190.
- 549 Edgar RC (2004) MUSCLE: multiple sequence alignment with high accuracy and high  
550 throughput. *Nucleic Acids Res.* 32: 1792-1797.
- 551 Edgar RC, Haas BJ, Clemente JC, Quince C & Knight R (2011) UCHIME improves  
552 sensitivity and speed of chimera detection. *Bioinformatics* 27: 2194-2200.
- 553 Hofstetter RW, Dinkins-Bookwalter J, Davis TS & Klepzig KD (2015) Symbiotic  
554 associations of bark beetles. *Bark Beetles*, Vega F E & Hofstetter R W (Édit.)  
555 Elsevier, USA.
- 556 Hu X, Li M & Chen H (2015) Community structure of gut fungi during different  
557 developmental stages of the Chinese white pine beetle (*Dendroctonus armandi*).  
558 *Sci Rep* 5.
- 559 Hulcr J & Dunn RR (2011) The sudden emergence of pathogenicity in insect-fungus  
560 symbioses threatens naive forest ecosystems. *Proceedings of the Royal Society B:*  
561 *Biological Sciences* 278: 2866-2873.
- 562 Khadempour L, LeMay V, Jack D, Bohlmann J & Breuil C (2012) The relative abundance  
563 of mountain pine beetle fungal associates through the beetle life cycle in pine  
564 trees. *Microb. Ecol.* 64: 909-917.
- 565 Klepzig KD & Six DL (2004) Bark beetle-fungal symbiosis: Context dependency in  
566 complex associations. *Symbiosis* 37: 189-205.
- 567 Langor DW & Raske AG (1987a) Emergence, host attack, and overwintering behavior of  
568 the eastern larch beetle, *Dendroctonus simplex* LeConte (Coleoptera: Scolytidae),  
569 in Newfoundland. *The Canadian Entomologist* 119: 975-983.
- 570 Langor DW & Raske AG (1987b) Reproduction and development of the eastern larch  
571 beetle, *Dendroctonus simplex* LeConte (Coleoptera: Scolytidae), in  
572 Newfoundland. *The Canadian Entomologist* 119: 985-992.
- 573 Langor DW & Raske AG (1989) The eastern larch beetle, another threat to our forests  
574 (Coleoptera: Scolytidae). *Forestry Chronicle* 65: 276-279.

- 575 Lou Q-Z, Lu M & Sun J-H (2014) Yeast diversity associated with invasive *Dendroctonus*  
576 *valens* killing *Pinus tabulaeformis* in China using culturing and molecular methods.  
577 *Microb. Ecol.*
- 578 Martin KJ & Rygielwicz PT (2005) Fungal-specific PCR primers developed for analysis of  
579 the ITS region of environmental DNA extracts. *BMC Microbiol.* 5: 1-11.
- 580 Moore ML & Six DL (2015) Effects of temperature on growth, sporulation, and  
581 competition of mountain pine beetle fungal symbionts. *Fungal Microbiology* 70:  
582 336-347.
- 583 Mueller UG & Gerardo NM (2002) Fungus-farming insects: Multiple origins and diverse  
584 evolutionary histories. *PNAS* 99: 15247-15249.
- 585 Mueller UG, Gerardo NM, Aanen DK, Six DL & Schultz TR (2005) The evolution of  
586 agriculture in insects. *Annual Review of Ecology, Evolution, and Systematics* 36:  
587 563-595.
- 588 Paine TD, Raffa KF & Harrington TC (1997) Interactions among scolytid bark-beetles,  
589 their associated fungi, and live host conifers. *Annu. Rev. Entomol.*:179-206.
- 590 Popa V, Déziel E, Lavallée R, Bause E & Guertin C (2012) The complex symbiotic  
591 relationships of bark beetles with microorganisms: A potential practical  
592 approach for biological control in forestry. *Pest Manag. Sci.* 68: 963-975.
- 593 Price MN, Dehal PS & Arkin AP (2010) FastTree 2 – Approximately maximum-likelihood  
594 trees for large alignments. *PLoS ONE* 5: e9490.
- 595 Quast C, Pruesse E, Yilmaz P, Gerken J, Schweer T, Yarza P, Peplies J & Glöckner FO  
596 (2013) The SILVA ribosomal RNA gene database project: improved data  
597 processing and web-based tools. *Nucleic Acids Res.* 41: D590-D596.
- 598 Rivera FN, Gonzalez E, Gomez Z, Lopez N, Hernandez-Rodriguez C, Berkov A & Zuniga G  
599 (2009) Gut-associated yeast in bark beetles of the genus *Dendroctonus* Erichson  
600 (Coleoptera: Curculionidae: Scolytinae). *Biol. J. Linn. Soc.* 98: 325-342.
- 601 Schloss PD, Westcott SL, Ryabin T, Hall JR, Hartmann M, Hollister EB, Lesniewski RA,  
602 Oakley BB, Parks DH, Robinson CJ, Sahl JW, Stres B, Thallinger GG, Van Horn DJ &  
603 Weber CF (2009) Introducing mothur: open-source, platform-independent,  
604 community-supported software for describing and comparing microbial  
605 communities. *Applied and Environmental Microbiology* 75: 7537-7541.
- 606 Schmitt S, Tsai P, Bell J, Fromont J, Ilan M, Lindquist N, Perez T, Rodrido A, Schupp PJ,  
607 Vacelet J, Webster NS, Hentschel U & Taylor MW (2012) Assessing the complex  
608 sponge microbiota: core, variable and species-specific bacterial communities in  
609 marine sponges. *The ISME Journal* 6: 564-576.
- 610 Seybold SJ, Albers MA & Katovich SA (2002) Eastern Larch Beetle. *Forest Insects &*  
611 *Disease Leaflet* 175: 1-10.
- 612 Shi W, Guo Y, Xu C, Tan S, Miao J, Feng Y, Zhao H, St. Leger RJ & Fang W (2014) Unveiling  
613 the mechanism by which microsporidian parasites prevent locust swarm  
614 behavior. *PNAS* 111: 1343-1348.
- 615 Six DL (2003) A comparison of mycangial and foretic fungi of individual mountain pine  
616 beetles. *Can. J. For. Res.* 33: 1331-1334.
- 617 Six DL (2012) Ecological and evolutionary determinants of bark beetle — fungus  
618 symbioses. *Insects* 3: 339-366.

- 619 Six DL (2013) The bark beetle holobiont: Why microbes matter. *J. Chem. Ecol.* 39: 989-  
620 1002.
- 621 Six DL, De Beer ZW, Duong TA, Carroll AL & Wingfield MJ (2011) Fungal associates of the  
622 lodgepole pine beetle, *Dendroctonus murrayanae*. *Antonie van Leeuwenhoek*,  
623 *International Journal of General and Molecular Microbiology* 100: 231-244.
- 624 Six DL & Klepzig KD (2004) *Dendroctonus* Bark Beetles as Model Systems for Studies on  
625 Symbiosis. *Symbiosis* 37: 207-232.
- 626 Six DL & Paine TD (1998) Effects of mycangial fungi and host tree species on progeny  
627 survival and emergence of *Dendroctonus ponderosae* (Coleoptera: Scolytidae).  
628 *Environ. Entomol.* 27: 1393-1401.
- 629 Six DL & Wingfield MJ (2011) The role of phytopathogenicity in bark beetle–fungus  
630 symbioses: a challenge to the Classic Paradigm. *Annu. Rev. Entomol.*:255-272.
- 631 White TJ, Bruns T, Lee S & Taylor J (1990) *Amplification of direct sequencing of fungal*  
632 *ribosomal RNA genes for phylogenetics*. Academic Press, New York.
- 633 Wood SL (2007) *Bark and ambrosia beetles of South America (Coleoptera: Scolytidae)*.  
634 Brigham Young University, Provo, Utah USA. 900 p.
- 635
- 636

637 **Figures**

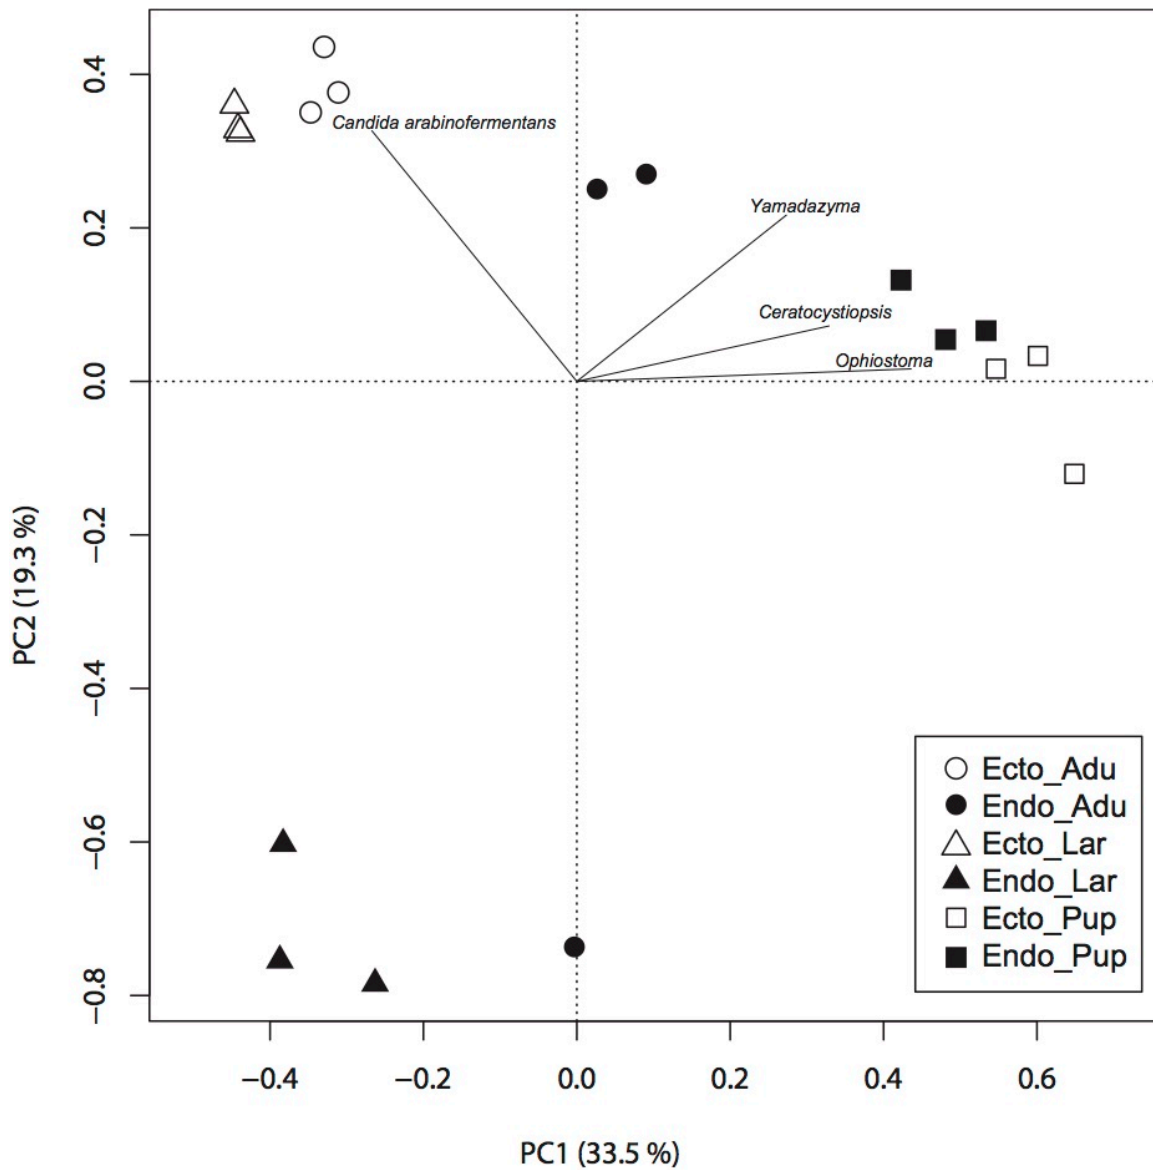

638

639 **Figure 1. Principal component analysis of the different developmental stages and**  
640 **microenvironments of *D. simplex*.** 50 insects were used per replicates, representing 150  
641 insects for each developmental stage. All generated OTUs and equalized dataset were  
642 used to construct the PCA. Relative abundance of each OTU was used. “ECTO”,  
643 ectomycobiome; “ENDO”, endomycobiome; “ADU”, adults; “LAR”, larvae; “PUP”, pupae.

644

645

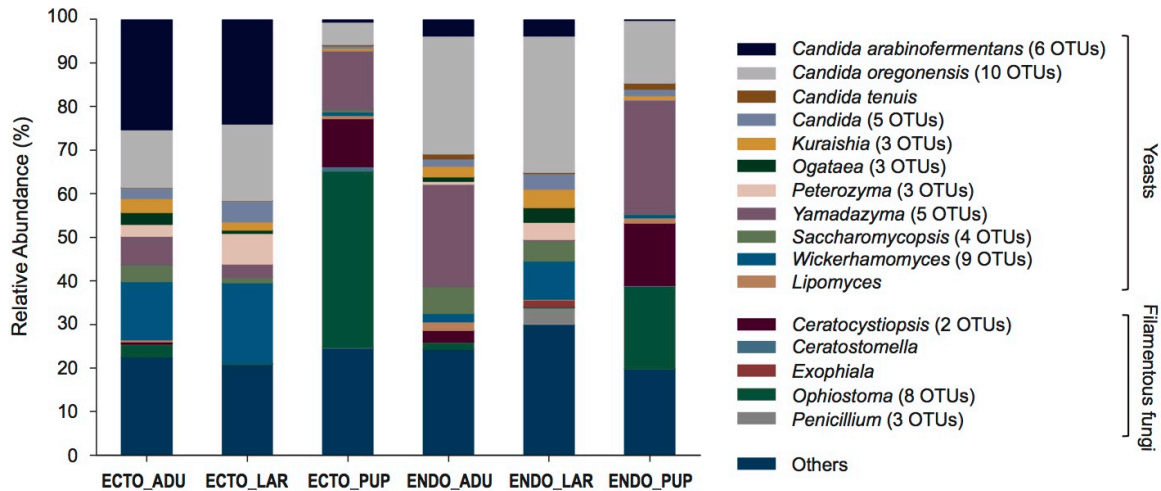

646

647

**Figure 2. Taxonomical identification of the fungal community associated to the**

648

**developmental stages and microenvironments of the eastern larch beetle. 50 insects**

649

were used per replicates, representing 150 insects for each developmental stage. All

650

abundant OTUs ( $\geq 1\%$  of the relative abundance per sample) are represented. Non-

651

abundant OTUs ( $< 1\%$ ) are grouped in the category others. Mean relative abundance of

652

the three replicates is represented for each developmental stage. Yeasts identified to

653

the gender represent cultured strains. “ECTO”, ectomycobiome; “ENDO”,

654

endomycobiome; “ADU”, adults; “LAR”, larvae; “PUP”, pupae.

655

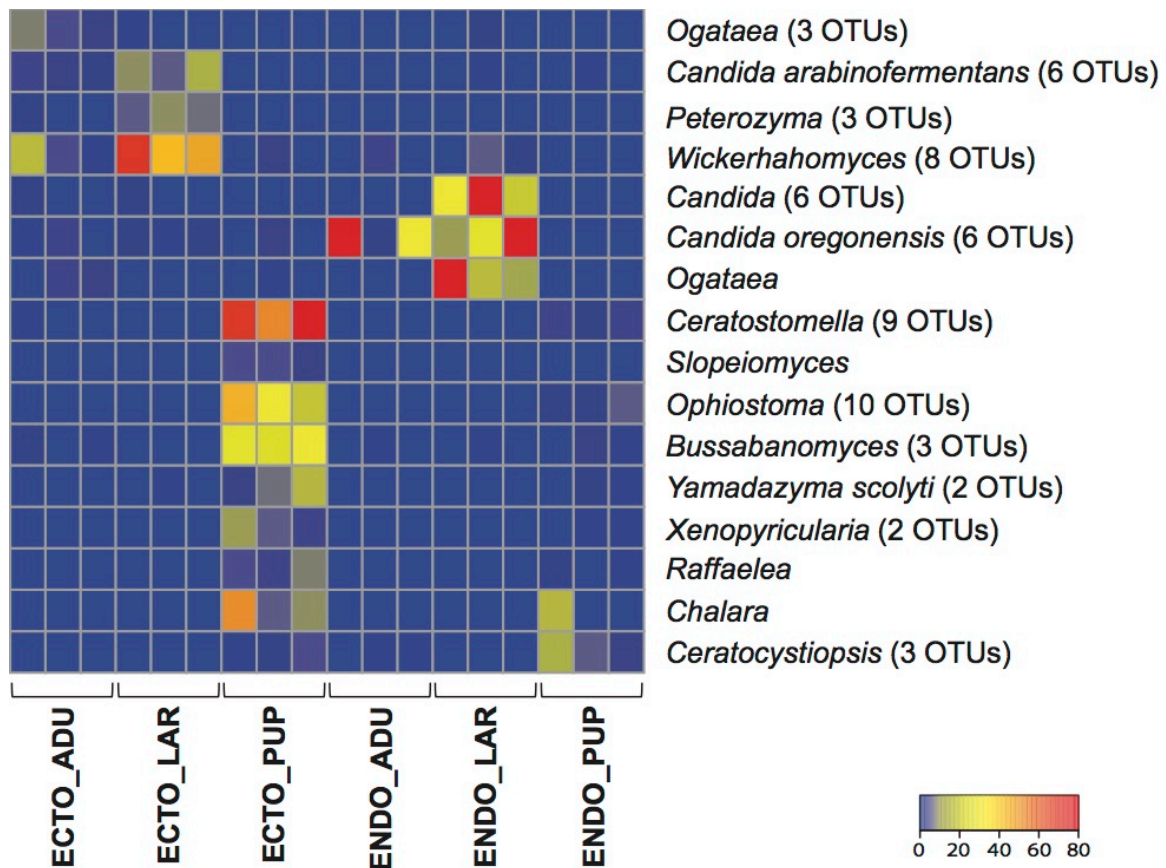

656

657 **Figure 3. Indicator OTUs for each developmental stage and microenvironments of the**  
 658 **eastern larch beetle.** All generated OTUs and equalized dataset were used. All three  
 659 replicates are shown on the heat map. Color key represent de number of sequences for  
 660 the observed OTUs. Yeasts identified to the gender represent cultured strains. “ECTO”,  
 661 ectomycobiome; “ENDO”, endomycobiome; “ADU”, adults; “LAR”, larvae; “PUP”, pupae.  
 662

663 **Table**

664

665 **Table 1. Taxonomical identification of the fungal community associated to the**  
666 **environment of the eastern larch beetle.** All abundant OTUs ( $\geq 1\%$  of the relative  
667 abundance per sample) are represented in the table, non-abundant OTUs ( $< 1\%$ ) are  
668 grouped in the category others. The mean relative abundance of the three replicates is  
669 presented.

670

| <b>Taxonomical identification</b> | <b>Relative abundance</b> |
|-----------------------------------|---------------------------|
| <i>Candida</i> (9 OTUs)           | 43.77                     |
| <i>Yamadazyma</i> (2 OTUs)        | 3.96                      |
| <i>Ogataea</i> (4 OTUs)           | 6.13                      |
| <i>Kuraishia</i> (2 OTUs)         | 3.85                      |
| <i>Peterozyma</i> (2 OTUs)        | 3.75                      |
| <i>Saccharomycopsis</i> (2 OTUs)  | 1.67                      |
| <i>Wickerhamomyces</i> (6 OTUs)   | 17.23                     |
| Others                            | 19.06                     |

671
